# Supplementary material for: Optical properties and electrical transport of thin films of terbium(III) bis(phthalocyanine) on cobalt
Source: publisher site journal article supplement (doi:10.3762/bjnano.5.215), 2014-11-11
Supplement: Additional file 1 [file 2190-4286-5-215-S1.pdf]

# Supporting Information

for

## Optical properties and electrical transport of thin films of terbium(III) bis(phthalocyanine) on cobalt

Peter Robaschik<sup>1</sup>, Pablo F. Siles<sup>2,3</sup>, Daniel Bülz<sup>1</sup>, Peter Richter<sup>1</sup>, Manuel Monecke<sup>1</sup>, Michael Fronk<sup>1</sup>, Svetlana Klyatskaya<sup>4</sup>, Daniel Grimm<sup>2,3</sup>, Oliver G. Schmidt<sup>2,3</sup>, Mario Ruben<sup>4,5</sup>, Dietrich R. T. Zahn<sup>1</sup>, and Georgeta Salvan<sup>\*1</sup>

Address: <sup>1</sup>Semiconductor Physics, Technische Universität Chemnitz, Reichenhainer Straße 70, 09107 Chemnitz, Germany, <sup>2</sup>Material Systems for Nanoelectronics, Technische Universität Chemnitz, Reichenhainer Straße 70, 09107 Chemnitz, Germany, <sup>3</sup>Institute for Integrative Nanosciences, IFW Dresden, Helmholtzstraße 20, 01069 Dresden, Germany, <sup>4</sup>Institute of Nanotechnology, Karlsruhe Institute of Technology (KIT), 76344 Eggenstein-Leopoldshafen, Germany, and <sup>5</sup>Université de Strasbourg, Institut de Physique et de Chimie des Matériaux de Strasbourg, CNRS UMP 7504, 23 Rue du Loess, 67034 Strasbourg Cedex 2, France

Email: Georgeta Salvan\* - [salvan@physik.tu-chemnitz.de](mailto:salvan@physik.tu-chemnitz.de)

\* Corresponding author

# Ellipsometry and AFM analysis

## Ellipsometry data and modelling

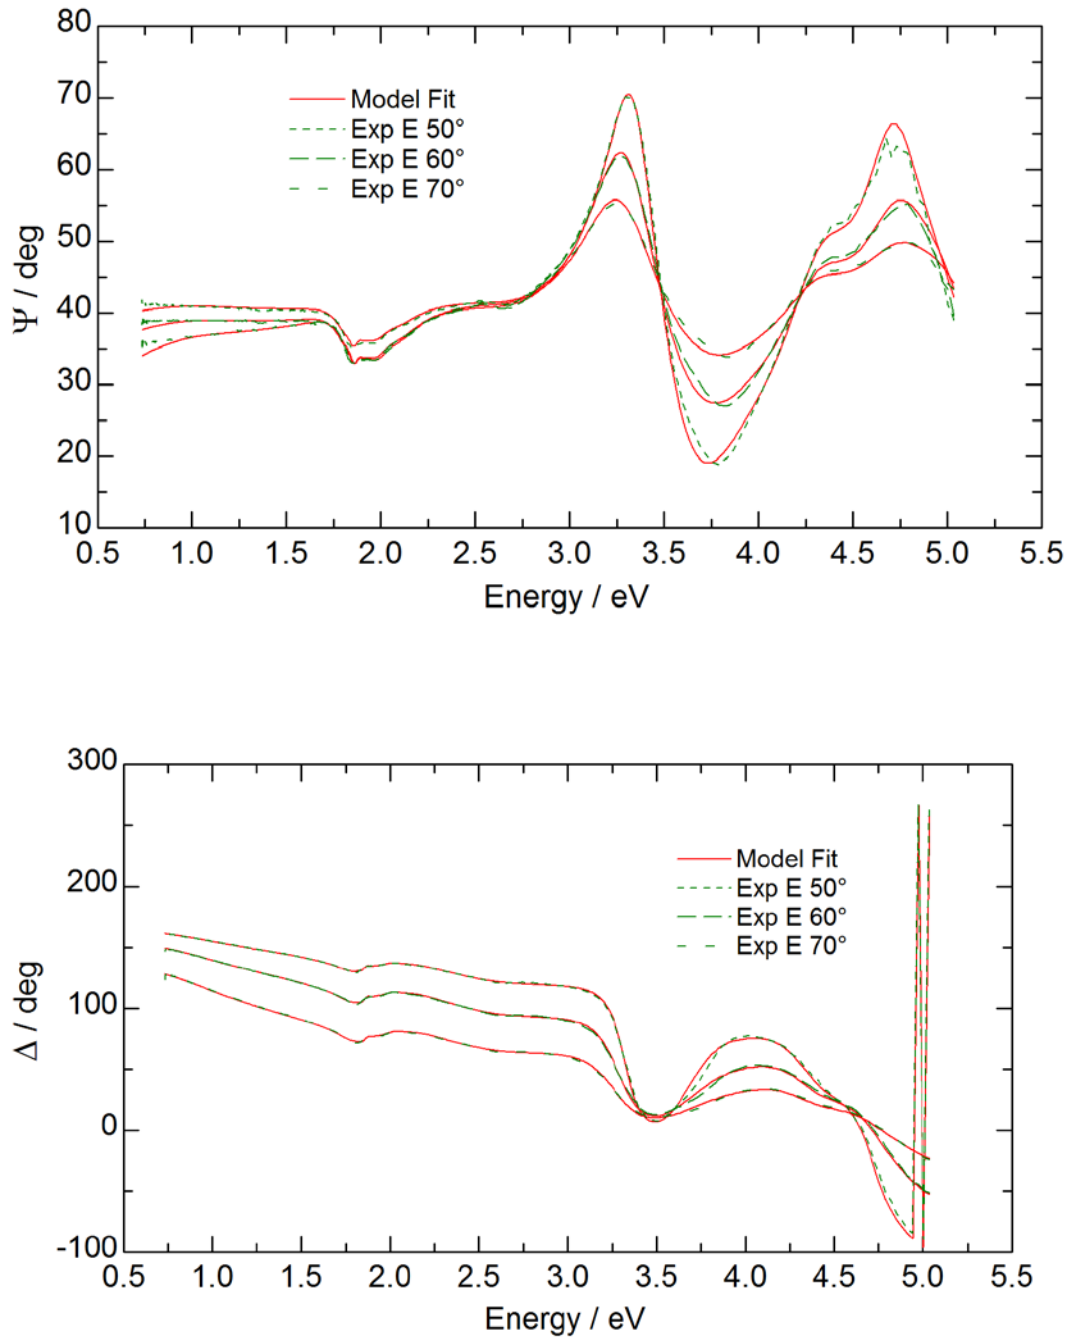

**Figure S1:** Ellipsometry data of the 41 nm TbPc<sub>2</sub> on Co sample (green dashed lines) and the corresponding model fit (red solid lines).

## AFM analysis

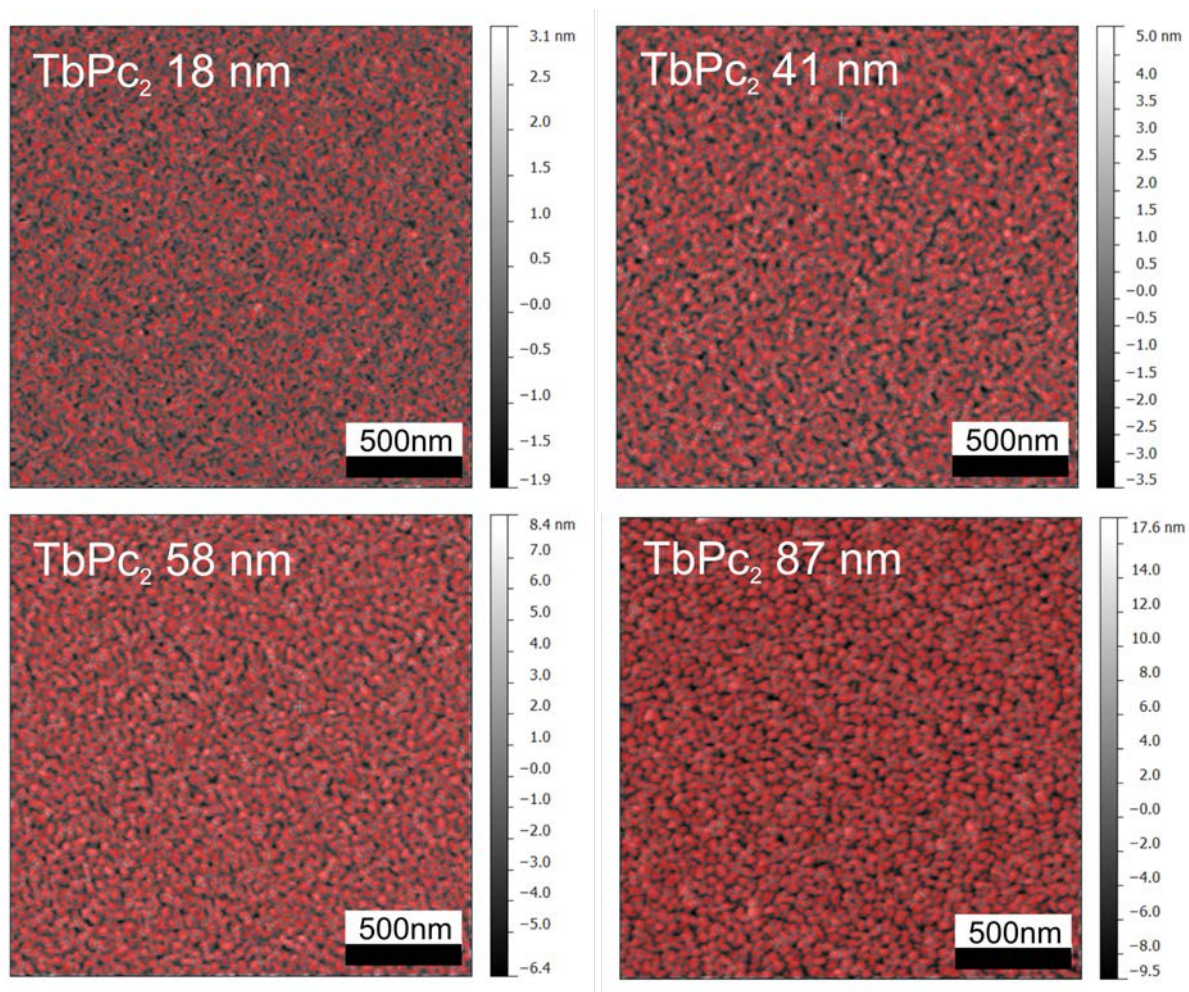

**Figure S2:** AFM topography images for statistical analysis of TbPc<sub>2</sub> grain size evolution as a function of film thickness. Gray-scaled images correspond to the original AFM images shown in Figure 4. Red-colored areas correspond to the analysis grain definition, each red area represent a grain over the organic surface. Statistical analysis allows quantifying parameters such as the number of grains, height and diameter.

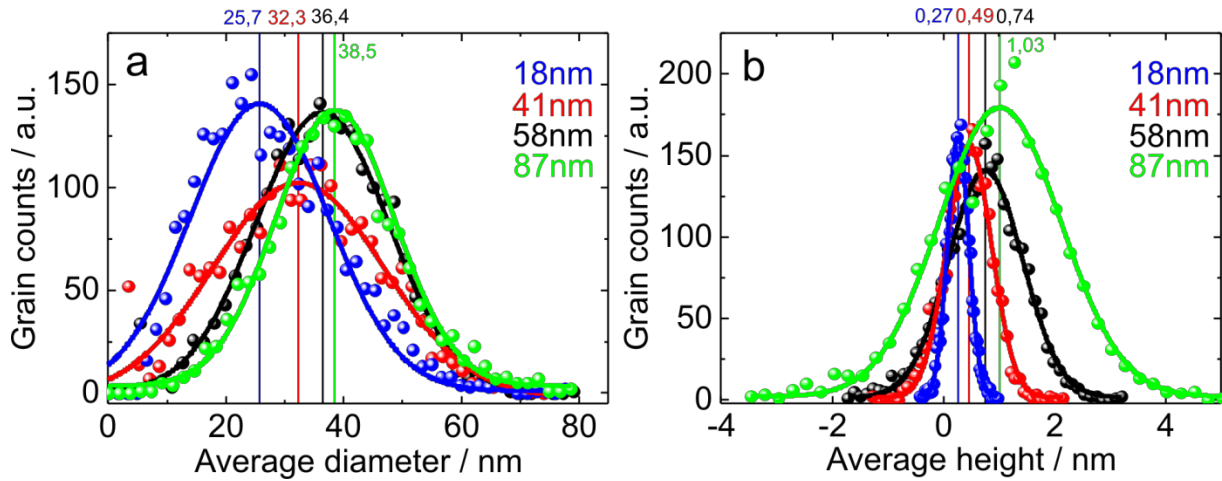

**Figure S3:** Statistical analysis of grain height and diameter as a function of the thickness of  $\text{TbPc}_2$ . Histograms are obtained from the grain definition shown in Figure S2.

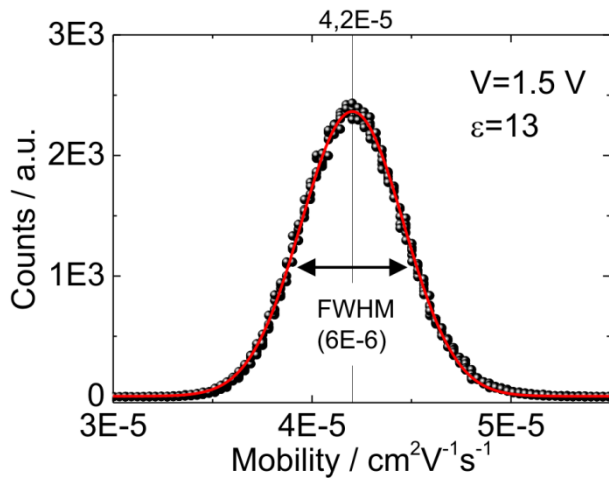

**Figure S4:** Statistical error estimation for charge carrier mobility given a dielectric constant of 13. Analysis is performed from a current map at 1.5 V. The error is defined as the FWHM value of a Gaussian fit showing the mobility value for all the  $512 \times 512$  data points of the current map.

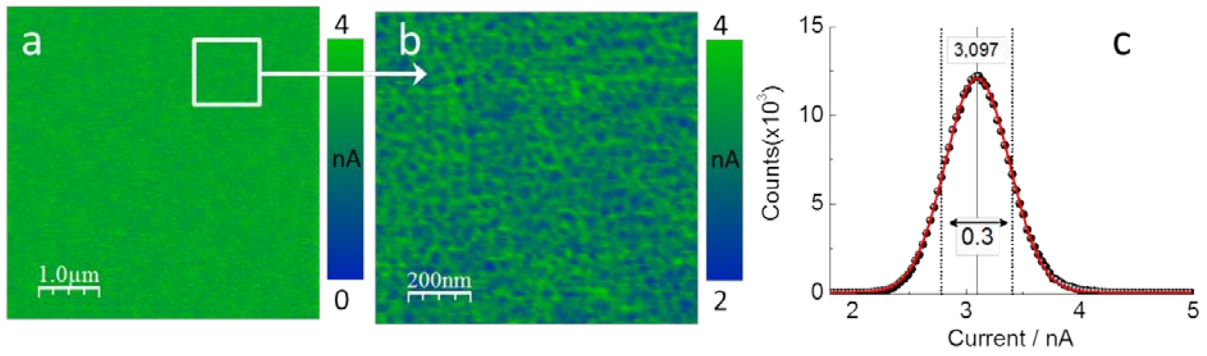

**Figure S5:** (a) Current map obtained at 1.5 V on an 80 nm thick TbPc<sub>2</sub> sample. (b) Higher magnification of current map in (a) for a 1 × 1 μm<sup>2</sup> area as indicated in (a). (c) Electrical current dispersion considering all of the 512 × 512 data points of current map shown in (a).
